# Supplementary material for: Genetic and structural characterization of dengue virus involved in the 2023 autochthonous outbreaks in central Italy
Source: PubMed Central journal article supplement — Emerg Microbes Infect. 2024 Oct 30;13(1):2420734. doi: 10.1080/22221751.2024.2420734 (PMC11536660; doi:10.1080/22221751.2024.2420734), 2024-10-30
Supplement: TEMI_A_2420734_SM2008.pdf [file TEMI_A_2420734_SM2008.pdf]

| Primer/probe ID | Primer/probe sequence       |
|-----------------|-----------------------------|
| D1-F            | C AAAAGGAAGTCGYGCAATA       |
| D1-R            | CTGAGTGAATTCTCTCTACTGAAC    |
| D1-Probe        | CATGTGGYTGGGAGCRCGC         |
| D2-F            | CAGGCTATGGCACYGTCACGAT      |
| D2-R            | CCATYTG CAGCARCACCATCTC     |
| D2-Probe        | CTCYCCRAGAACGGGCCTCGACTTCAA |
| D3-F            | GGACTRGACACACGCACCCA        |
| D3-R            | CATGTCTCTACCTTCTCGACTTGYCT  |
| D3-Probe        | ACCTGGATGTTCGGCTGAAGGAGCTTG |
| D4-F            | TTGTCCTAATGATGCTRGTCG       |
| D4-R            | TCCACCYGAGACTCCTTCCA        |
| D4-Probe        | TYCCTACYCCTACGCATCGCATTCCG  |

Ref: Santiago GA, Vergne E, Quiles Y, et al. Analytical and clinical performance of the CDC real time RT-PCR assay for detection and typing of dengue. *virusPLoS Negl Trop Dis.* 2013 Jul 11;7(7):e2311. doi: 10.1371/journal.pntd.0002311

| Primer ID    | Primer sequence     |
|--------------|---------------------|
| primer1-fw   | CGTGGGAATAGGCAAC    |
| primer1-rw   | TTGAACTTGGCACACG    |
| primer1nt-fw | TCGTTGAAGGACTGTC    |
| primer1nt-rw | TTGAACTTGGCACACG    |
| primer2-fw   | GTCTATTGACGTGTGCC   |
| primer2-rw   | CTTGAGATGTTGAAGC    |
| primer2nt-fw | TGTGCCAAGTTCAAGT    |
| primer2nt-rw | TGGCAGTGGTAAGTCT    |
| primer3-fw   | GGCTTGTCCACAAACA    |
| primer3-rw   | GCACTAGGACAGTTCC    |
| primer3nt-fw | GGCTTGTCCACAAACA    |
| primer3nt-rw | CCACTTCCTTCTCTAGCTT |
| primer4-fw   | TGCACAGGCTCATTTA    |
| primer4-rw   | GTGTCTCCCAGGATAG    |
| primer4nt-fw | AGAAGGAAGTGGCTGA    |
| primer4nt-rw | GCGGTTGCTTCGAACA    |
| primer5-fw   | GAaAGGAAGCAGCATA    |
| primer5-rw   | TCCACATTTAAGTTCTC'  |
| primer5nt-fw | AAATGTTCGAAGCAAC    |
| primer5nt-rw | ATTACACATCCCGAAT    |

Ref: ON426308

In order to amplify also samples with very low amounts of viral RNA, 5 different semi-nested PCRs with overlapping target regions were designed in order to completely cover the Dengue 1 E gene. Table x shows the primers used and their positions with respect to the viral polyprotein and/or the E gene. Reference:

| Primer ID    | Primer sequence   |
|--------------|-------------------|
| primer1-fw   | CGTGGGAATAGGCAAC  |
| primer1-rw   | TTGAACTTGGCACACG  |
| primer1nt-fw | TCGTTGAAGGACTGTC  |
| primer1nt-rw | TTGAACTTGGCACACG  |
| primer2-fw   | GTCTATTGACGTGTGCC |
| primer2-rw   | CTTGAGATGTTGAAGC  |
| primer2nt-fw | TGTGCCAAGTTCAAGT  |

|              |                     |
|--------------|---------------------|
| primer2nt-rw | TGGCAGTGGTAAGTCT    |
| primer3-fw   | GGCTTGTCCACAAACA    |
| primer3-rw   | GCACTAGGACAGTTCC    |
| primer3nt-fw | GGCTTGTCCACAAACA    |
| primer3nt-rw | CCACTTCCTTCTCTAGCTT |
| primer4-fw   | TGCACAGGCTCATTTA    |
| primer4-rw   | GTGTCTCCCAGGATAG    |
| primer4nt-fw | AGAAGGAAGTGGCTGA    |
| primer4nt-rw | GCGGTTGCTTCGAACA    |
| primer5-fw   | GAaAGGAAGCAGCATA    |
| primer5-rw   | TCCACATTTAAGTTCTC'  |
| primer5nt-fw | AAATGTTCGAAGCAAC    |
| primer5nt-rw | ATTACACATCCCGAAT    |

|        | Poliprotein position |      | E gene position |      |           |           |
|--------|----------------------|------|-----------------|------|-----------|-----------|
| AGAG   | 917                  | 936  | 9               | 28   | 917-936   | 9-28      |
| ATCAA  | 1248                 | 1267 | 340             | 359  | 1248-1267 | 340-359   |
| AGGA   | 940                  | 959  | 32              | 51   | 940-959   | 32-51     |
| ATCAA  | 1248                 | 1267 | 340             | 359  | 1248-1267 | 340-359   |
| AAAGT  | 1243                 | 1263 | 335             | 355  | 1243-1263 | 335-355   |
| ACCC   | 1574                 | 1593 | 666             | 685  | 1574-1593 | 666-685   |
| GTGT   | 1254                 | 1273 | 346             | 365  | 1254-1273 | 346-365   |
| AGAA   | 1546                 | 1565 | 638             | 657  | 1546-1565 | 638-657   |
| ATGG   | 1525                 | 1544 | 617             | 636  | 1525-1544 | 617-636   |
| ATGC   | 1856                 | 1875 | 948             | 967  | 1856-1875 | 948-967   |
| ATGG   | 1525                 | 1544 | 617             | 636  | 1525-1544 | 617-636   |
| AAATGA | 1821                 | 1845 | 913             | 937  | 1821-1845 | 913-937   |
| AGCT   | 1812                 | 1821 | 904             | 923  | 1812-1821 | 904-923   |
| CCAT   | 2142                 | 2161 | 1234            | 1253 | 2142-2161 | 1234-1253 |
| AGACC  | 1834                 | 1853 | 926             | 945  | 1834-1853 | 926-945   |
| ATTT   | 2106                 | 2125 | 1198            | 1217 | 2106-2125 | 1198-1217 |
| GGGA   | 2087                 | 2106 | 1179            | 1198 | 2087-2106 | 1179-1198 |
| TGCCC  | 2420                 | 2441 | ND              | ND   | 2420-2441 | ND-ND     |
| CGCC   | 2107                 | 2126 | 1199            | 1218 | 2107-2126 | 1199-1218 |
| CCGC   | 2391                 | 2410 | ND              | ND   | 2391-2410 | ND-ND     |

rent nested or  
to almost  
and their  
: ON426308

|       | Poliprotein position | E gene position |
|-------|----------------------|-----------------|
| AGAG  | 917-936              | 9-28            |
| ATCAA | 1248-1267            | 340-359         |
| AGGA  | 940-959              | 32-51           |
| ATCAA | 1248-1267            | 340-359         |
| AAAGT | 1243-1263            | 335-355         |
| ACCC  | 1574-1593            | 666-685         |
| GTGT  | 1254-1273            | 346-365         |

|         |           |           |
|---------|-----------|-----------|
| 'AGAA   | 1546-1565 | 638-657   |
| .ATGG   | 1525-1544 | 617-636   |
| 'ATGC   | 1856-1875 | 948-967   |
| .ATGG   | 1525-1544 | 617-636   |
| 'AAATGA | 1821-1845 | 913-937   |
| .AGCT   | 1812-1821 | 904-923   |
| 'CCAT   | 2142-2161 | 1234-1253 |
| .AGACC  | 1834-1853 | 926-945   |
| 'TTTT   | 2106-2125 | 1198-1217 |
| .GGGA   | 2087-2106 | 1179-1198 |
| 'TGCCC  | 2420-2441 | ND-ND     |
| .CCGC   | 2107-2126 | 1199-1218 |
| 'CCGC   | 2391-2410 | ND-ND     |
